# Supplementary material for: Effect of the Indentation Load on the Raman Spectra of the InP Crystal
Source: MDPI journal article supplement (doi:10.3390/ma15155098), 2022-07-22
Supplement: s1 [file s1]

### Effect of the indentation load on the Raman spectra of the InP crystal

Dariusz Chrobak<sup>1,\*</sup>, Mateusz Dulski<sup>1</sup>, Grzegorz Ziółkowski<sup>2</sup>, Artur Chrobak<sup>2</sup>

<sup>1</sup> *Institute of Materials Engineering, Faculty of Science and Technology, University of Silesia in Katowice, 75 Pułku Piechoty 1A, 41-500 Chorzów, Poland*

<sup>2</sup> *Institute of Physics, Faculty of Science and Technology, University of Silesia in Katowice, 75 Pułku Piechoty 1A, 41-500 Chorzów, Poland*

\* Corresponding Author, e-mail address: [dariusz.chrobak@us.edu.pl](mailto:dariusz.chrobak@us.edu.pl)

#### Supporting Figures

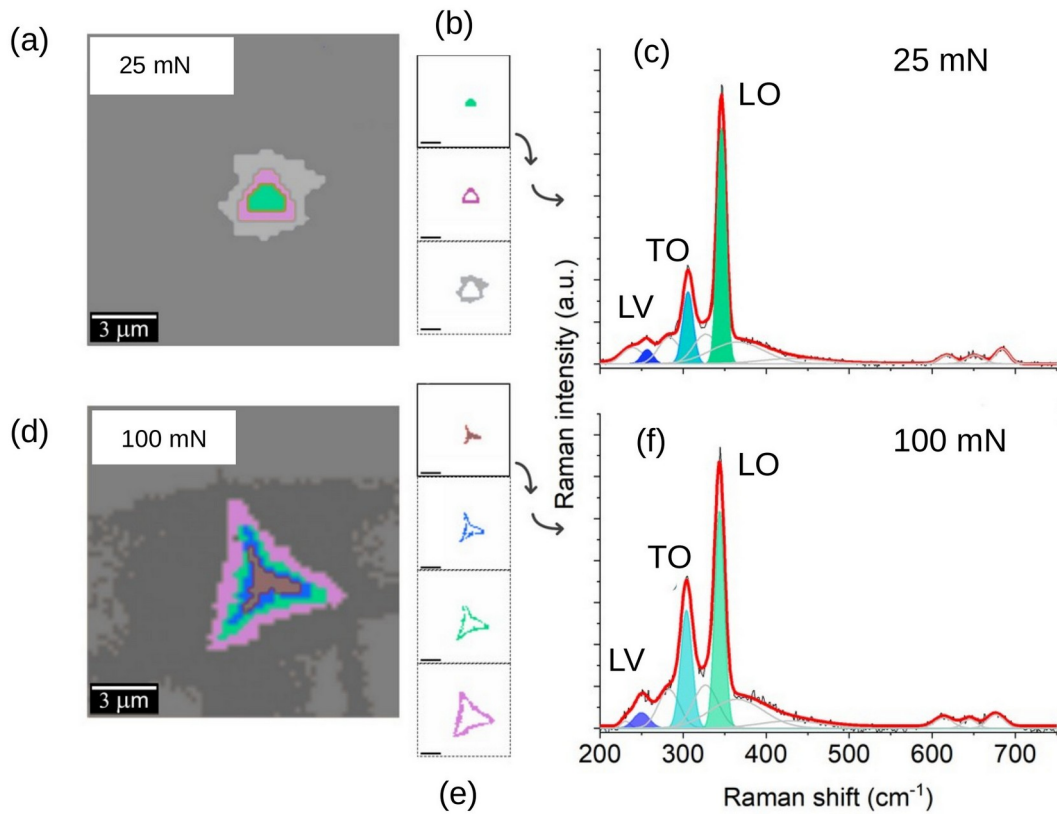

**Figure S1** Exemplary K-means cluster analysis was performed on the base of Raman imaging around the S-doped InP crystal place indented at 25 mN and 100 mN loads. **(a,d)** An image of structural changes around the indents. **(b,e)** Individual clusters show the structural changes after indentation. **(c,f)** Raman spectra were obtained on the base of the signal exported from the most central fragment of the indent (arrows). Raman spectra were fitted using the Lorentz-Gauss function, while the color-highlighted peaks reveal the main LV, TO, and LO modes.

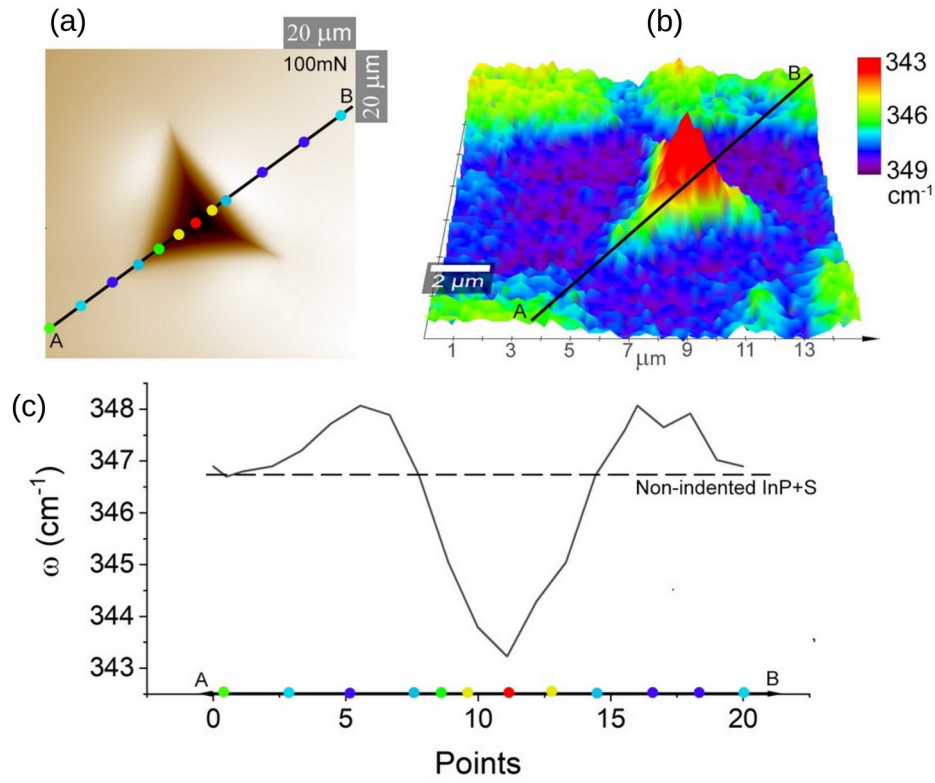

**Figure S2** (a) The schematic image of the indent with cross-section and color highlighted points among the cross-section involving the information about the position of the LO mode. (b) Color-highlighted 3D Raman maps with a color corresponding to the position of the LO mode. (c) Cross-section profile through the indent prepared on the base of the position of LO mode. Data presented exemplary case of the S-doped InP indented with the maximum load 100mN.
